# Supplementary material for: Relationship between osteoporosis, sarcopenia, vertebral fracture, and osteosarcopenia in patients with primary biliary cholangitis
Source: PubMed Central journal article supplement — Eur J Gastroenterol Hepatol. 2020 Jul 16;33(5):731–7. doi: 10.1097/MEG.0000000000001791 (PMC8016510; doi:10.1097/meg.0000000000001791), 2020-07-16
Supplement: ejgh-33-731-s001.pdf [file ejgh-33-731-s001.pdf]

**Table S1 Factors associated with osteoporosis in patients with primary biliary cholangitis**

| Variable                              | Univariate            |         | Multivariate         |         |
|---------------------------------------|-----------------------|---------|----------------------|---------|
|                                       | OR (95%CI)            | P-value | OR (95%CI)           | P-value |
| Female                                | 1.840 (0.569–5.945)   | 0.308   |                      |         |
| Age (years)                           | 1.098 (1.046–1.153)   | <0.001  | 1.090 (1.034–1.148)  | 0.001   |
| BMI (kg/m <sup>2</sup> )              | 0.762 (0.653–0.890)   | 0.001   | 0.823 (0.690–0.982)  | 0.031   |
| Liver cirrhosis                       | 3.511 (0.991–12.436)  | 0.052   |                      |         |
| Age at diagnosis (years)              | 1.063 (1.021–1.106)   | 0.003   |                      |         |
| Duration of disease (years)           | 1.056 (0.993–1.123)   | 0.080   |                      |         |
| AST (IU/L)                            | 0.997 (0.967–1.029)   | 0.873   |                      |         |
| ALT (IU/L)                            | 0.953 (0.906–1.003)   | 0.064   |                      |         |
| ALP (IU/L)                            | 1.000 (0.998–1.003)   | 0.742   |                      |         |
| GGT (IU/L)                            | 0.998 (0.991–1.005)   | 0.517   |                      |         |
| Total bilirubin (mg/dL)               | 1.105 (0.655–1.865)   | 0.708   |                      |         |
| Albumin (g/dL)                        | 0.277 (0.102–0.755)   | 0.012   |                      |         |
| M2BPGi (C.O.I)                        | 1.125 (0.881–1.436)   | 0.347   |                      |         |
| IGF-1 (ng/mL)                         | 0.980 (0.967–0.993)   | 0.004   |                      |         |
| BCAA (μmol/L)                         | 0.994 (0.989–0.999)   | 0.018   |                      |         |
| TRACP-5b (mU/dL)                      | 1.002 (0.999–1.004)   | 0.218   |                      |         |
| Total P1NP (ng/mL)                    | 1.003 (0.983–1.024)   | 0.746   |                      |         |
| SMI (kg/m <sup>2</sup> )              | 0.266 (0.144–0.491)   | <0.001  |                      |         |
| Handgrip strength (kg)                | 0.777 (0.693–0.870)   | <0.001  |                      |         |
| Lumbar spine BMD (g/cm <sup>2</sup> ) | 0.000 (0.000–0.005)   | <0.001  |                      |         |
| Femoral neck BMD (g/cm <sup>2</sup> ) | 0.000 (0.000–0.000)   | <0.001  |                      |         |
| Total hip BMD (g/cm <sup>2</sup> )    | 0.000 (0.000–0.000)   | <0.001  |                      |         |
| Sarcopenia                            | 10.000 (3.778–26.470) | <0.001  | 4.126 (1.280–13.297) | 0.018   |
| Vertebral fracture                    | 6.175 (2.251–16.939)  | <0.001  |                      |         |

ALP, alkaline phosphatase; ALT, alanine aminotransferase; AST, aspartate aminotransferase; BCAA, branched-chain amino acids; BMD, bone mineral density; BMI, body mass index; CI, confidence interval; GGT, gamma-glutamyltransferase; IGF-1, insulin-like growth factor 1; M2BPGi, Mac-2 binding protein glycosylation isomer; OR, odds ratio; P1NP, procollagen type I N-terminal propeptide; skeletal muscle mass index; SMI, skeletal muscle mass index; TRACP-5b, tartrate resistant acid phosphatase-5b.

**Table S2 Factors associated with sarcopenia in patients with primary biliary cholangitis**

| Variable                              | Univariate           |         | Multivariate          |         |
|---------------------------------------|----------------------|---------|-----------------------|---------|
|                                       | OR (95%CI)           | P-value | OR (95%CI)            | P-value |
| Female                                | 2.000 (0.541–7.388)  | 0.298   |                       |         |
| Age (years)                           | 1.053 (1.009–1.099)  | 0.019   |                       |         |
| BMI (kg/m <sup>2</sup> )              | 0.695 (0.576–0.839)  | <0.001  | 0.708 (0.568–0.883)   | 0.002   |
| Liver cirrhosis                       | 4.857 (1.351–17.457) | 0.015   |                       |         |
| Age at diagnosis (years)              | 1.051 (1.009–1.095)  | 0.018   |                       |         |
| Duration of disease (years)           | 0.998 (0.932–1.070)  | 0.963   |                       |         |
| AST (IU/L)                            | 1.015 (0.985–1.045)  | 0.327   |                       |         |
| ALT (IU/L)                            | 0.966 (0.918–1.016)  | 0.182   |                       |         |
| ALP (IU/L)                            | 1.001 (0.998–1.004)  | 0.542   |                       |         |
| GGT (IU/L)                            | 0.999 (0.992–1.006)  | 0.709   |                       |         |
| Total bilirubin (mg/dL)               | 1.626 (0.868–3.049)  | 0.129   |                       |         |
| Albumin (g/dL)                        | 0.210 (0.072–0.611)  | 0.004   |                       |         |
| M2BPGi (C.O.I)                        | 1.362 (1.013–1.831)  | 0.041   |                       |         |
| IGF-1 (ng/mL)                         | 0.985 (0.972–0.999)  | 0.033   |                       |         |
| BCAA (μmol/L)                         | 0.997 (0.993–1.002)  | 0.215   |                       |         |
| TRACP-5b (mU/dL)                      | 1.001 (0.998–1.004)  | 0.432   |                       |         |
| Total P1NP (ng/mL)                    | 0.999 (0.978–1.021)  | 0.935   |                       |         |
| SMI (kg/m <sup>2</sup> )              | 0.024 (0.005–0.108)  | <0.001  |                       |         |
| Handgrip strength (kg)                | 0.617 (0.505–0.755)  | <0.001  |                       |         |
| Lumbar spine BMD (g/cm <sup>2</sup> ) | 0.004 (0.000–0.069)  | <0.001  |                       |         |
| Femoral neck BMD (g/cm <sup>2</sup> ) | 0.001 (0.000–0.036)  | <0.001  |                       |         |
| Total hip BMD (g/cm <sup>2</sup> )    | 0.000 (0.000–0.025)  | <0.001  |                       |         |
| Osteoporosis                          | 8.875 (3.376–23.334) | <0.001  | 3.420 (1.057–11.067)  | 0.040   |
| Vertebral fracture                    | 9.518 (3.340–27.126) | <0.001  | 10.936 (2.678–44.663) | 0.001   |

ALP, alkaline phosphatase; ALT, alanine aminotransferase; AST, aspartate aminotransferase; BCAA, branched-chain amino acids; BMD, bone mineral density; BMI, body mass index; CI, confidence interval; GGT, gamma-glutamyltransferase; IGF-1, insulin-like growth factor 1; M2BPGi, Mac-2 binding protein glycosylation isomer; OR, odds ratio; P1NP, procollagen type I N-terminal propeptide; skeletal muscle mass index; SMI, skeletal muscle mass index; TRACP-5b, tartrate resistant acid phosphatase-5b.

**Table S3 Comparison of clinical characteristics between female patients with and without osteoporosis**

| Variable                              | All patients     | Osteoporosis     | Non-osteoporosis | P-value |
|---------------------------------------|------------------|------------------|------------------|---------|
| Patients, n (%)                       | 96               | 29 (30.2)        | 67 (69.8)        |         |
| Age (years)                           | 67.0 (57.0–73.0) | 71.0 (66.5–77.0) | 63.0 (55.0–70.0) | <0.001  |
| BMI (kg/m <sup>2</sup> )              | 22.3 (20.1–24.9) | 20.3 (18.6–22.8) | 22.7 (20.7–26.0) | 0.002   |
| Liver cirrhosis, n (%)                | 7 (7.3)          | 5 (17.2)         | 2 (3.0)          | 0.014   |
| Age at diagnosis (years)              | 60.5 (50.0–68.0) | 64.0 (54.0–72.0) | 57.0 (49.0–66.0) | 0.019   |
| Duration of disease (years)           | 3.0 (1.0–8.0)    | 5.0 (2.0–13.0)   | 2.0 (1.0–6.0)    | 0.038   |
| Menopause, n (%)                      | 83 (86.5)        | 28 (96.6)        | 55 (82.1)        | 0.057   |
| Duration of menopause (years)         | 15.0 (6.3–24.0)  | 23.0 (14.5–27.0) | 13.0 (3.0–18.0)  | <0.001  |
| AST (IU/L)                            | 25 (21–30)       | 26 (23–30)       | 24 (20–29)       | 0.565   |
| ALT (IU/L)                            | 20 (14–24)       | 18 (14–22)       | 20 (14–24)       | 0.525   |
| ALP (IU/L)                            | 282 (216–348)    | 271 (206–319)    | 290 (224–363)    | 0.202   |
| GGT (IU/L)                            | 38 (24–60)       | 31 (25–54)       | 41 (23–65)       | 0.287   |
| Total bilirubin (mg/dL)               | 0.6 (0.5–0.8)    | 0.5 (0.4–0.7)    | 0.6 (0.5–0.8)    | 0.092   |
| Albumin (g/dL)                        | 4.1 (3.9–4.3)    | 4.0 (3.9–4.3)    | 4.2 (3.9–4.4)    | 0.037   |
| M2BPGi (C.O.I)                        | 0.87 (0.57–1.36) | 1.13 (0.62–1.66) | 0.82 (0.57–1.23) | 0.055   |
| IGF-1 (ng/mL)                         | 89 (61–112)      | 61 (46–101)      | 95 (68–116)      | 0.002   |
| BCAA (μmol/L)                         | 412 (356–460)    | 379 (326–430)    | 433 (379–482)    | 0.013   |
| TRACP-5b (mU/dL)                      | 351 (240–475)    | 384 (281–498)    | 343 (231–477)    | 0.402   |
| P1NP (ng/mL)                          | 47 (34–58)       | 47 (33–59)       | 48 (34–59)       | 0.780   |
| SMI (kg/m <sup>2</sup> )              | 6.01 (5.32–6.48) | 5.30 (4.97–5.86) | 6.11 (5.74–6.57) | <0.001  |
| Handgrip strength (kg)                | 21.8 (17.2–23.8) | 17.0 (14.7–20.3) | 22.7 (19.3–25.5) | <0.001  |
| Lumbar spine BMD (g/cm <sup>2</sup> ) | 1.03 (0.87–1.17) | 0.80 (0.71–0.91) | 1.09 (0.97–1.21) | <0.001  |
| Femoral neck BMD (g/cm <sup>2</sup> ) | 0.74 (0.67–0.84) | 0.63 (0.58–0.69) | 0.77 (0.72–0.89) | <0.001  |
| Total hip BMD (g/cm <sup>2</sup> )    | 0.79 (0.71–0.88) | 0.67 (0.60–0.71) | 0.84 (0.77–0.93) | <0.001  |
| Sarcopenia, n (%)                     | 24 (25.0)        | 16 (55.2)        | 8 (11.9)         | <0.001  |
| Vertebral fracture, n (%)             | 16 (16.7)        | 10 (34.5)        | 6 (9.0)          | 0.002   |

Values are shown as median (interquartile range) or number (percentage). Statistical analysis was performed using the chi-squared test or the Mann-Whitney U test, as appropriate. ALP, alkaline phosphatase; ALT, alanine aminotransferase; AST, aspartate aminotransferase; BCAA, branched-chain amino acids; BMD, bone mineral density; BMI, body mass index; GGT, gamma-glutamyltransferase; IGF-1, insulin-like growth factor 1; M2BPGi, Mac-2 binding protein glycosylation isomer; P1NP, procollagen type I N-terminal propeptide; SMI, skeletal muscle mass index; TRACP-5b, tartrate-resistant acid phosphatase 5b.

**Table S4 Comparison of clinical characteristics between female patients with and without sarcopenia**

| Variable                              | Sarcopenia       | Non-sarcopenia   | P-value |
|---------------------------------------|------------------|------------------|---------|
| Patients, n (%)                       | 24 (25.0)        | 72 (75.0)        |         |
| Age (years)                           | 73.0 (65.0–76.8) | 65.5 (56.0–71.0) | 0.008   |
| BMI (kg/m <sup>2</sup> )              | 19.6 (18.0–21.5) | 22.8 (20.7–25.9) | <0.001  |
| Liver cirrhosis, n (%)                | 4 (16.7)         | 3 (4.2)          | 0.041   |
| Age at diagnosis (years)              | 66.5 (51.5–73.0) | 57.0 (50.0–66.0) | 0.022   |
| Duration of disease (years)           | 3.5 (1.0–8.8)    | 2.0 (1.0–8.0)    | 0.698   |
| Menopause, n (%)                      | 22 (91.7)        | 61 (84.7)        | 0.389   |
| Duration of menopause (years)         | 22.5 (13.3–28.8) | 13.5 (5.0–20.0)  | 0.006   |
| AST (IU/L)                            | 25 (22–32)       | 26 (20–30)       | 0.946   |
| ALT (IU/L)                            | 18 (14–21)       | 20 (14–24)       | 0.358   |
| ALP (IU/L)                            | 284 (217–337)    | 281 (216–352)    | 0.800   |
| GGT (IU/L)                            | 34 (21–60)       | 39 (24–63)       | 0.449   |
| Total bilirubin (mg/dL)               | 0.5 (0.5–0.7)    | 0.6 (0.5–0.8)    | 0.144   |
| Albumin (g/dL)                        | 4.0 (3.8–4.2)    | 4.2 (3.9–4.4)    | 0.077   |
| M2BPGi (C.O.I)                        | 1.27 (0.70–1.79) | 0.83 (0.55–1.22) | 0.008   |
| IGF-1 (ng/mL)                         | 77 (48–104)      | 94 (66–114)      | 0.067   |
| BCAA (μmol/L)                         | 381 (326–493)    | 421 (377–458)    | 0.331   |
| TRACP-5b (mU/dL)                      | 390 (215–510)    | 344 (240–469)    | 0.682   |
| P1NP (ng/mL)                          | 38 (31–61)       | 48 (36–58)       | 0.268   |
| SMI (kg/m <sup>2</sup> )              | 5.08 (4.84–5.92) | 6.27 (5.88–6.57) | <0.001  |
| Handgrip strength (kg)                | 16.6 (14.1–17.2) | 22.6 (20.0–25.2) | <0.001  |
| Lumbar spine BMD (g/cm <sup>2</sup> ) | 0.88 (0.64–0.74) | 1.08 (0.92–1.21) | <0.001  |
| Femoral neck BMD (g/cm <sup>2</sup> ) | 0.68 (0.64–0.74) | 0.77 (0.70–0.89) | <0.001  |
| Total hip BMD (g/cm <sup>2</sup> )    | 0.72 (0.66–0.78) | 0.82 (0.73–0.92) | 0.001   |
| Osteoporosis, n (%)                   | 16 (66.7)        | 13 (18.1)        | <0.001  |
| Vertebral fracture, n (%)             | 10 (41.7)        | 6 (8.3)          | <0.001  |

Values are shown as median (interquartile range) or number (percentage). Statistical analysis was performed using the chi-squared test or the Mann-Whitney U test, as appropriate. ALP, alkaline phosphatase; ALT, alanine aminotransferase; AST, aspartate aminotransferase; BCAA, branched-chain amino acids; BMD, bone mineral density; BMI, body mass index; GGT, gamma-glutamyltransferase; IGF-1, insulin-like growth factor 1; M2BPGi, Mac-2 binding protein glycosylation isomer; P1NP, procollagen type I N-terminal propeptide; SMI, skeletal muscle mass index; TRACP-5b, tartrate-resistant acid phosphatase 5b.

**Table S5 Factors associated with osteoporosis in female patients with primary biliary cholangitis**

| Variable                              | Univariate           |         | Multivariate         |         |
|---------------------------------------|----------------------|---------|----------------------|---------|
|                                       | OR (95%CI)           | P-value | OR (95%CI)           | P-value |
| Age (years)                           | 1.088 (1.034–1.145)  | 0.001   | 1.074 (1.018–1.132)  | 0.008   |
| BMI (kg/m <sup>2</sup> )              | 0.790 (0.676–0.924)  | 0.003   |                      |         |
| Liver cirrhosis                       | 6.771 (1.230–37.262) | 0.028   |                      |         |
| Age at diagnosis (years)              | 1.054 (1.010–1.099)  | 0.015   |                      |         |
| Duration of disease (years)           | 1.055 (0.989–1.125)  | 0.107   |                      |         |
| Menopause                             | 6.109 (0.756–49.398) | 0.090   |                      |         |
| Duration of menopause (years)         | 1.092 (1.039–1.148)  | 0.001   |                      |         |
| AST (IU/L)                            | 1.002 (0.964–1.041)  | 0.925   |                      |         |
| ALT (IU/L)                            | 0.959 (0.907–1.014)  | 0.145   |                      |         |
| ALP (IU/L)                            | 1.000 (0.997–1.003)  | 0.975   |                      |         |
| GGT (IU/L)                            | 0.996 (0.988–1.005)  | 0.424   |                      |         |
| Total bilirubin (mg/dL)               | 1.332 (0.677–2.621)  | 0.406   |                      |         |
| Albumin (g/dL)                        | 0.247 (0.075–0.818)  | 0.022   |                      |         |
| M2BPGi (C.O.I)                        | 1.197 (0.881–1.627)  | 0.250   |                      |         |
| IGF-1 (ng/mL)                         | 0.978 (0.963–0.993)  | 0.005   |                      |         |
| BCAA (μmol/L)                         | 0.996 (0.991–1.001)  | 0.140   |                      |         |
| TRACP-5b (mU/dL)                      | 1.001 (0.999–1.004)  | 0.375   |                      |         |
| Total P1NP (ng/mL)                    | 1.000 (0.979–1.021)  | 0.969   |                      |         |
| SMI (kg/m <sup>2</sup> )              | 0.277 (0.137–0.560)  | <0.001  |                      |         |
| Handgrip strength (kg)                | 0.740 (0.643–0.852)  | <0.001  |                      |         |
| Lumbar spine BMD (g/cm <sup>2</sup> ) | 0.000 (0.000–0.004)  | <0.001  |                      |         |
| Femoral neck BMD (g/cm <sup>2</sup> ) | 0.000 (0.000–0.000)  | <0.001  |                      |         |
| Total hip BMD (g/cm <sup>2</sup> )    | 0.000 (0.000–0.000)  | <0.001  |                      |         |
| Sarcopenia                            | 9.077 (3.209–25.672) | <0.001  | 6.510 (2.100–20.180) | 0.001   |
| Vertebral fracture                    | 5.351 (1.719–16.657) | 0.004   |                      |         |

ALP, alkaline phosphatase; ALT, alanine aminotransferase; AST, aspartate aminotransferase; BCAA, branched-chain amino acids; BMD, bone mineral density; BMI, body mass index; CI, confidence interval; GGT, gamma-glutamyltransferase; IGF-1, insulin-like growth factor 1; M2BPGi, Mac-2 binding protein glycosylation isomer; OR, odds ratio; P1NP, procollagen type I N-terminal propeptide; skeletal muscle mass index; SMI, skeletal muscle mass index; TRACP-5b, tartrate resistant acid phosphatase-5b.

**Table S6 Factors associated with sarcopenia in female patients with primary biliary cholangitis**

| Variable                              | Univariate           |         | Multivariate         |         |
|---------------------------------------|----------------------|---------|----------------------|---------|
|                                       | OR (95%CI)           | P-value | OR (95%CI)           | P-value |
| Age (years)                           | 1.055 (1.007–1.106)  | 0.025   |                      |         |
| BMI (kg/m <sup>2</sup> )              | 0.682 (0.555–0.839)  | <0.001  | 0.706 (0.562–0.888)  | 0.003   |
| Liver cirrhosis                       | 4.600 (0.950–22.278) | 0.058   |                      |         |
| Age at diagnosis (years)              | 1.049 (1.004–1.097)  | 0.032   |                      |         |
| Duration of disease (years)           | 1.005 (0.937–1.077)  | 0.899   |                      |         |
| Menopause                             | 1.984 (0.407–9.664)  | 0.397   |                      |         |
| Duration of menopause (years)         | 1.072 (1.021–1.126)  | 0.005   |                      |         |
| AST (IU/L)                            | 1.003 (0.963–1.045)  | 0.887   |                      |         |
| ALT (IU/L)                            | 0.960 (0.904–1.020)  | 0.183   |                      |         |
| ALP (IU/L)                            | 1.001 (0.997–1.004)  | 0.771   |                      |         |
| GGT (IU/L)                            | 0.998 (0.990–1.007)  | 0.713   |                      |         |
| Total bilirubin (mg/dL)               | 1.464 (0.711–3.014)  | 0.301   |                      |         |
| Albumin (g/dL)                        | 0.289 (0.089–0.941)  | 0.039   |                      |         |
| M2BPGi (C.O.I)                        | 1.245 (0.909–1.705)  | 0.171   |                      |         |
| IGF-1 (ng/mL)                         | 0.987 (0.973–1.001)  | 0.074   |                      |         |
| BCAA (μmol/L)                         | 0.999 (0.995–1.004)  | 0.745   |                      |         |
| TRACP-5b (mU/dL)                      | 1.001 (0.998–1.003)  | 0.614   |                      |         |
| Total P1NP (ng/mL)                    | 0.990 (0.966–1.014)  | 0.411   |                      |         |
| SMI (kg/m <sup>2</sup> )              | 0.007 (0.001–0.059)  | <0.001  |                      |         |
| Handgrip strength (kg)                | 0.527 (0.391–0.711)  | <0.001  |                      |         |
| Lumbar spine BMD (g/cm <sup>2</sup> ) | 0.009 (0.001–0.147)  | 0.001   |                      |         |
| Femoral neck BMD (g/cm <sup>2</sup> ) | 0.002 (0.000–0.158)  | 0.006   |                      |         |
| Total hip BMD (g/cm <sup>2</sup> )    | 0.001 (0.000–0.084)  | 0.002   |                      |         |
| Osteoporosis                          | 9.077 (3.209–25.672) | <0.001  | 4.012 (1.186–13.576) | 0.026   |
| Vertebral fracture                    | 7.857 (2.451–25.187) | 0.001   | 8.898 (1.828–43.305) | 0.007   |

ALP, alkaline phosphatase; ALT, alanine aminotransferase; AST, aspartate aminotransferase; BCAA, branched-chain amino acids; BMD, bone mineral density; BMI, body mass index; CI, confidence interval; GGT, gamma-glutamyltransferase; IGF-1, insulin-like growth factor 1; M2BPGi, Mac-2 binding protein glycosylation isomer; OR, odds ratio; P1NP, procollagen type I N-terminal propeptide; skeletal muscle mass index; SMI, skeletal muscle mass index; TRACP-5b, tartrate resistant acid phosphatase-5b.

**Table S7 Characteristics of patients with and without sarcopenia/osteoporosis**

| Variable                              | Osteoporosis (-) | Osteoporosis (+) | Osteoporosis (-) | Osteoporosis(+)  | P-value |
|---------------------------------------|------------------|------------------|------------------|------------------|---------|
|                                       | Sarcopenia (-)   | Sarcopenia(-)    | Sarcopenia (+)   | Sarcopenia (+)   |         |
| Patients, n (%)                       | 75 (64.1)        | 15 (12.8)        | 9 (7.7)          | 18 (15.4)        |         |
| Female, n (%)                         | 59 (78.7)        | 13 (86.7)        | 8 (88.9)         | 16 (88.9)        | 0.646   |
| Age (years)                           | 63.0 (53.0–70.0) | 73.0 (68.0–77.0) | 73.0 (56.0–76.0) | 73.5 (65.8–81.5) | <0.001  |
| BMI (kg/m <sup>2</sup> )              | 22.9 (21.2–26.0) | 22.6 (20.2–24.2) | 21.2 (18.9–24.2) | 19.3 (18.1–21.4) | <0.001  |
| Liver cirrhosis, n (%)                | 3 (4.0)          | 2 (13.3)         | 2 (22.2)         | 4 (22.2)         | 0.045   |
| Age at diagnosis (years)              | 57.0 (48.0–66.0) | 66.0 (57.0–71.0) | 72.0 (53.0–74.0) | 66.5 (52.5–74.3) | 0.003   |
| Duration of disease (years)           | 2.0 (1.0–6.0)    | 5.0 (2.0–15.0)   | 2.0 (1.0–3.5)    | 4.0 (1.0–10.5)   | 0.223   |
| AST (IU/L)                            | 24 (20–33)       | 27 (23–30)       | 24 (21–31)       | 26 (23–33)       | 0.964   |
| ALT (IU/L)                            | 20 (15–27)       | 18 (14–22)       | 18 (13–26)       | 18 (14–22)       | 0.478   |
| ALP (IU/L)                            | 290 (229–363)    | 271 (200–314)    | 300 (240–379)    | 272 (215–327)    | 0.645   |
| GGT (IU/L)                            | 43 (29–74)       | 28 (24–52)       | 41 (18–66)       | 33 (24–71)       | 0.391   |
| Total bilirubin (mg/dL)               | 0.6 (0.5–0.8)    | 0.6 (0.4–0.8)    | 0.6 (0.5–1.0)    | 0.5 (0.4–0.6)    | 0.150   |
| Albumin (g/dL)                        | 4.2 (3.9–4.3)    | 4.0 (3.9–4.3)    | 4.0 (3.4–4.5)    | 3.9 (3.7–4.1)    | 0.037   |
| M2BPGi (C.O.I)                        | 0.77 (0.57–1.12) | 0.96 (0.52–1.34) | 0.87 (0.67–3.59) | 1.47 (0.99–1.71) | 0.009   |
| IGF-1 (ng/mL)                         | 95 (73–117)      | 61 (51–101)      | 88 (57–114)      | 61 (45–96)       | 0.010   |
| BCAA (μmol/L)                         | 442 (396–500)    | 380 (325–436)    | 407 (321–486)    | 366 (310–443)    | 0.039   |
| TRACP-5b (mU/dL)                      | 328 (237–429)    | 384 (309–444)    | 440 (210–500)    | 390 (227–484)    | 0.499   |
| P1NP (ng/mL)                          | 44 (35–58)       | 48 (35–68)       | 52 (30–77)       | 40 (33–63)       | 0.837   |
| SMI (kg/m <sup>2</sup> )              | 6.48 (6.03–7.12) | 5.90 (5.75–6.35) | 5.27 (4.91–5.68) | 5.00 (4.43–5.24) | <0.001  |
| Handgrip strength (kg)                | 23.9 (21.9–28.1) | 21.9 (16.8–22.5) | 17.0 (14.8–17.3) | 16.6 (12.8–17.5) | <0.001  |
| Lumbar spine BMD (g/cm <sup>2</sup> ) | 1.11 (1.01–1.23) | 0.81 (0.70–0.87) | 0.96 (0.85–1.05) | 0.84 (0.74–0.94) | <0.001  |
| Femoral neck BMD (g/cm <sup>2</sup> ) | 0.82 (0.74–0.90) | 0.60 (0.57–0.67) | 0.75 (0.70–0.83) | 0.65 (0.58–0.71) | <0.001  |
| Total hip BMD (g/cm <sup>2</sup> )    | 0.85 (0.79–0.93) | 0.69 (0.58–0.71) | 0.79 (0.77–0.88) | 0.67 (0.62–0.72) | <0.001  |
| Vertebral fracture, n (%)             | 5 (6.7)          | 3 (20.0)         | 3 (33.3)         | 10 (55.6)        | <0.001  |

Values are shown as median (interquartile range) or number (percentage). Statistical analysis was performed using the chi-squared test or the Kruskal-Wallis test, as appropriate. ALP, alkaline phosphatase; ALT, alanine aminotransferase; AST, aspartate aminotransferase; BCAA, branched-chain amino acids; BMD, bone mineral density; BMI, body mass index; GGT, gamma-glutamyltransferase; IGF-1, insulin-like growth factor 1; M2BPGi, Mac-2 binding protein glycosylation isomer; P1NP, procollagen type I N-terminal propeptide; SMI, skeletal muscle mass index; TRACP-5b, tartrate-resistant acid phosphatase 5b.
